# Supplementary material for: The Detection of Pre-Diabetic Patients in the Dental Office
Source: Preprints.org preprint supplement (doi:10.20944/preprints201908.0285.v1), 2019-08-27
Supplement: Supplementary file 2 [file supplementary]

## Sheet: Sheet1
loc/non loc	M/F	age	PID	health condition	A1c	Findrisk	risk	perio UR6	UR1	LR6	UL6	LL1	LL6	response rate
loc	f	44	16576799	BP	5.3	14	3	3	0	0	0	0	0
loc	f	48	3995984	0	na	7	0	na	na	na	na	na	na
loc	f	39	2613115	0	6	11	1	0	0	0	0	0	0
non	m	54	28040821	0	6.5	11	1	1	0	0	4	3	0
loc	f	36	9470051	0	na	6	0	0	0	0	0	0	0
loc	m	44	115361600	0	6.7	15	3	missing	3	missing	missing	5	missing
non	f	50	11664215	0	na	5	0	na	na	na	na	na	na
non	m	43	46568328		6.5	8	1	7	3	5	7	3	5
loc	m	20	10531297	0	6	11	1	3	0	3	3	0	3
loc	f	34	7091397	0	4.7	12	1	3	1	3	3	1	3
loc	f	42	5456517	0	6.6	15	3	3	1	3	3	1	3
loc	f	45	1099604	0	6	14	3	3	1	3	3	0	1
loc	f	47	2486415	0	na	2	0	na	na	na	na	na	na	number of patients refused=3
non loc	f	45	6685544	1	5.6	19	3	0	0	0	0	0	0	number of patients refused=1
non loc	f	31	70850178	0	5.2	4	0	0	0	0	0	0	0
non loc	f	33	56927011	0	5.1	8	1	0	0	0	0	0	0
non loc	f	28	129366030	0	4.8	3	0	0	0	0	0	0	0
non loc	f	42	49554841	0	5	6	0	0	0	0	0	0	0
non loc	f	28	59469684	0	5	6	0	0	0	0	0	0	0
loc	f	36	12732249	0	5.6	14	2	0	0	0	0	0	0
non loc	f	29	45778132	0	5.3	10	1	0	0	0	0	0	0
loc	f	37	19809166	0	5.3	2	0	0	0	0	0	0	0
loc	f	38	7065213	0	5.1	12	2	0	0	0	0	0	0
non loc	f	29	97649601	0	4.7	12	2	0	0	0	0	0	0
non loc	f	21	24167550	0	5.3	12	2	0	0	0	0	0	0
loc	f	23	5600251	0	4.7	9	1	0	0	0	0	0	0
loc	f	44	5626358	0	5.6	13	2	0	0	0	0	0	0
non loc	m	40	25808729	0	5.1	6	0	0	0	0	0	0	0
loc	f	20	23494468	0	5.3	0	0	0	0	0	0	0	0
	f	29	30447534	0	5.1	9	1	0	0	0	0	0	0
loc	f	52	8729336	0	4.7	18	3	0	0	0	0	0	0
